# Supplementary figures and images for: One-pot direct C–H arylation of arenes in water catalysed by RuCl3·nH2O–NaOAc in the presence of Zn
Source: Royal Society of Chemistry journal article supplement (doi:10.1039/c3cc43452d), 2013-01-01

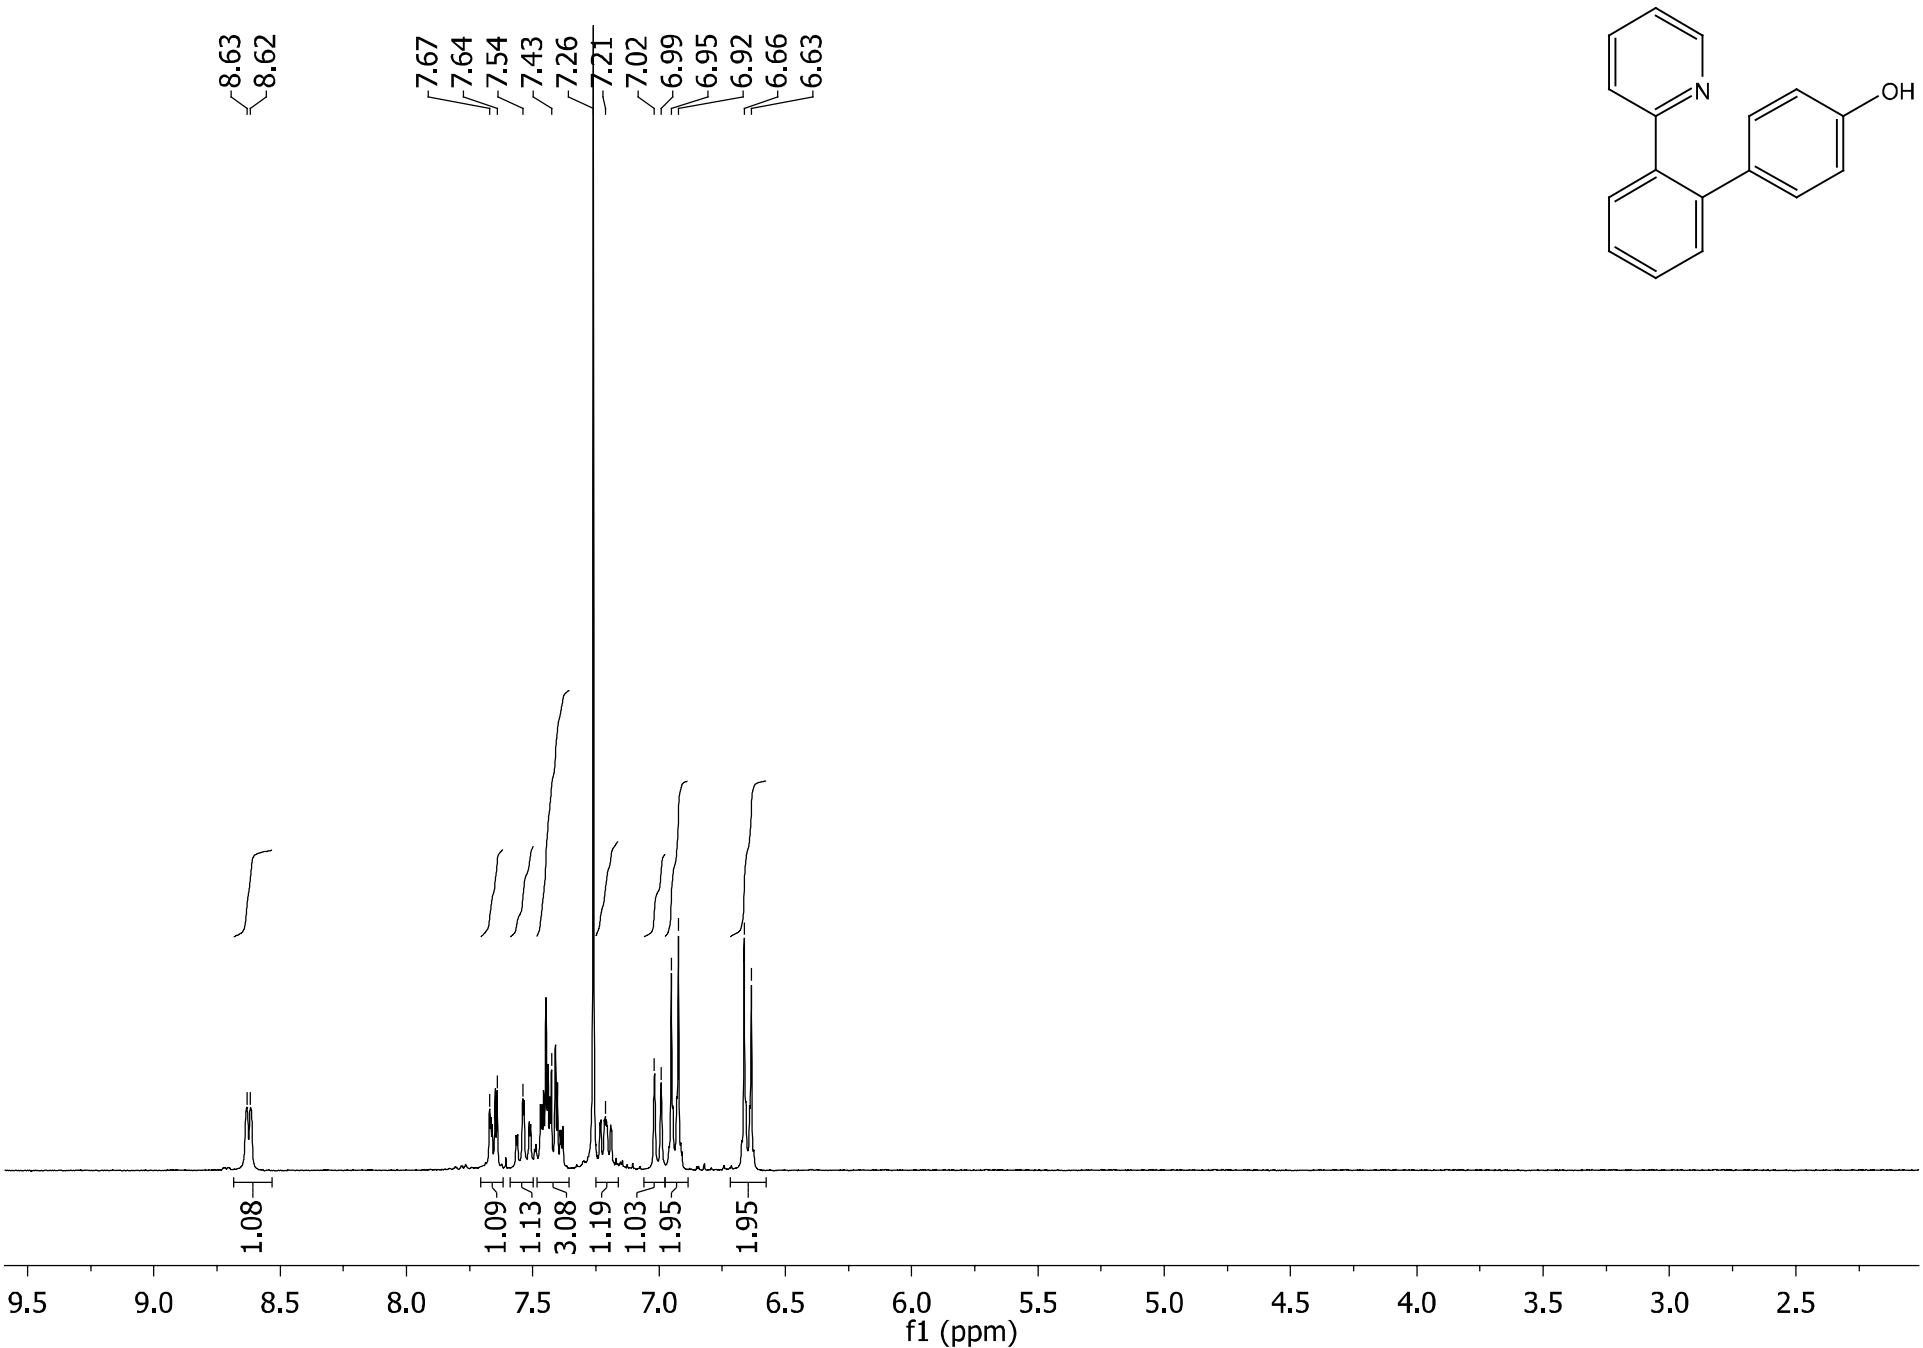

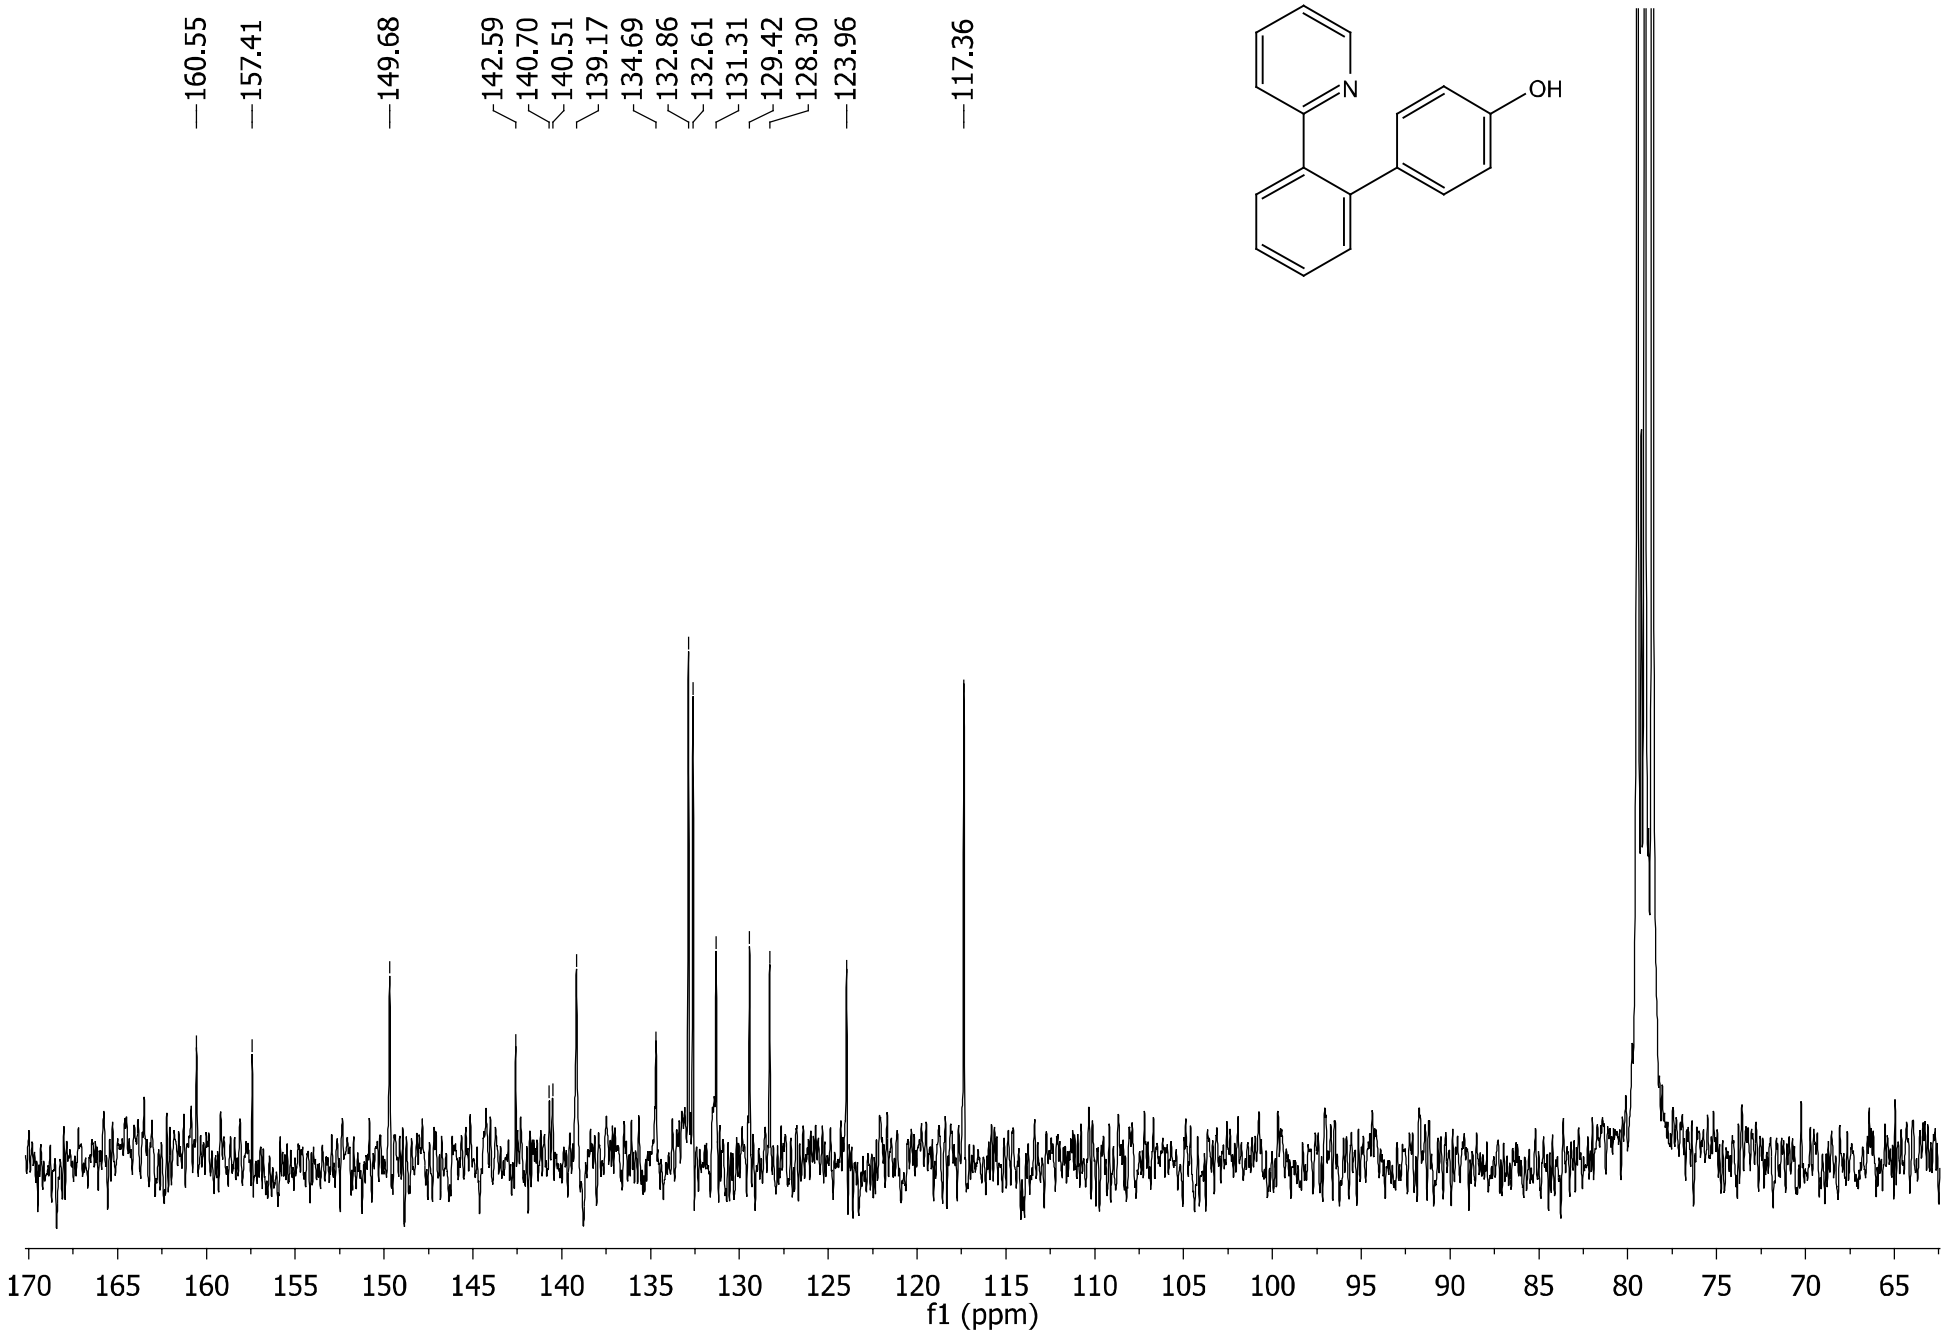

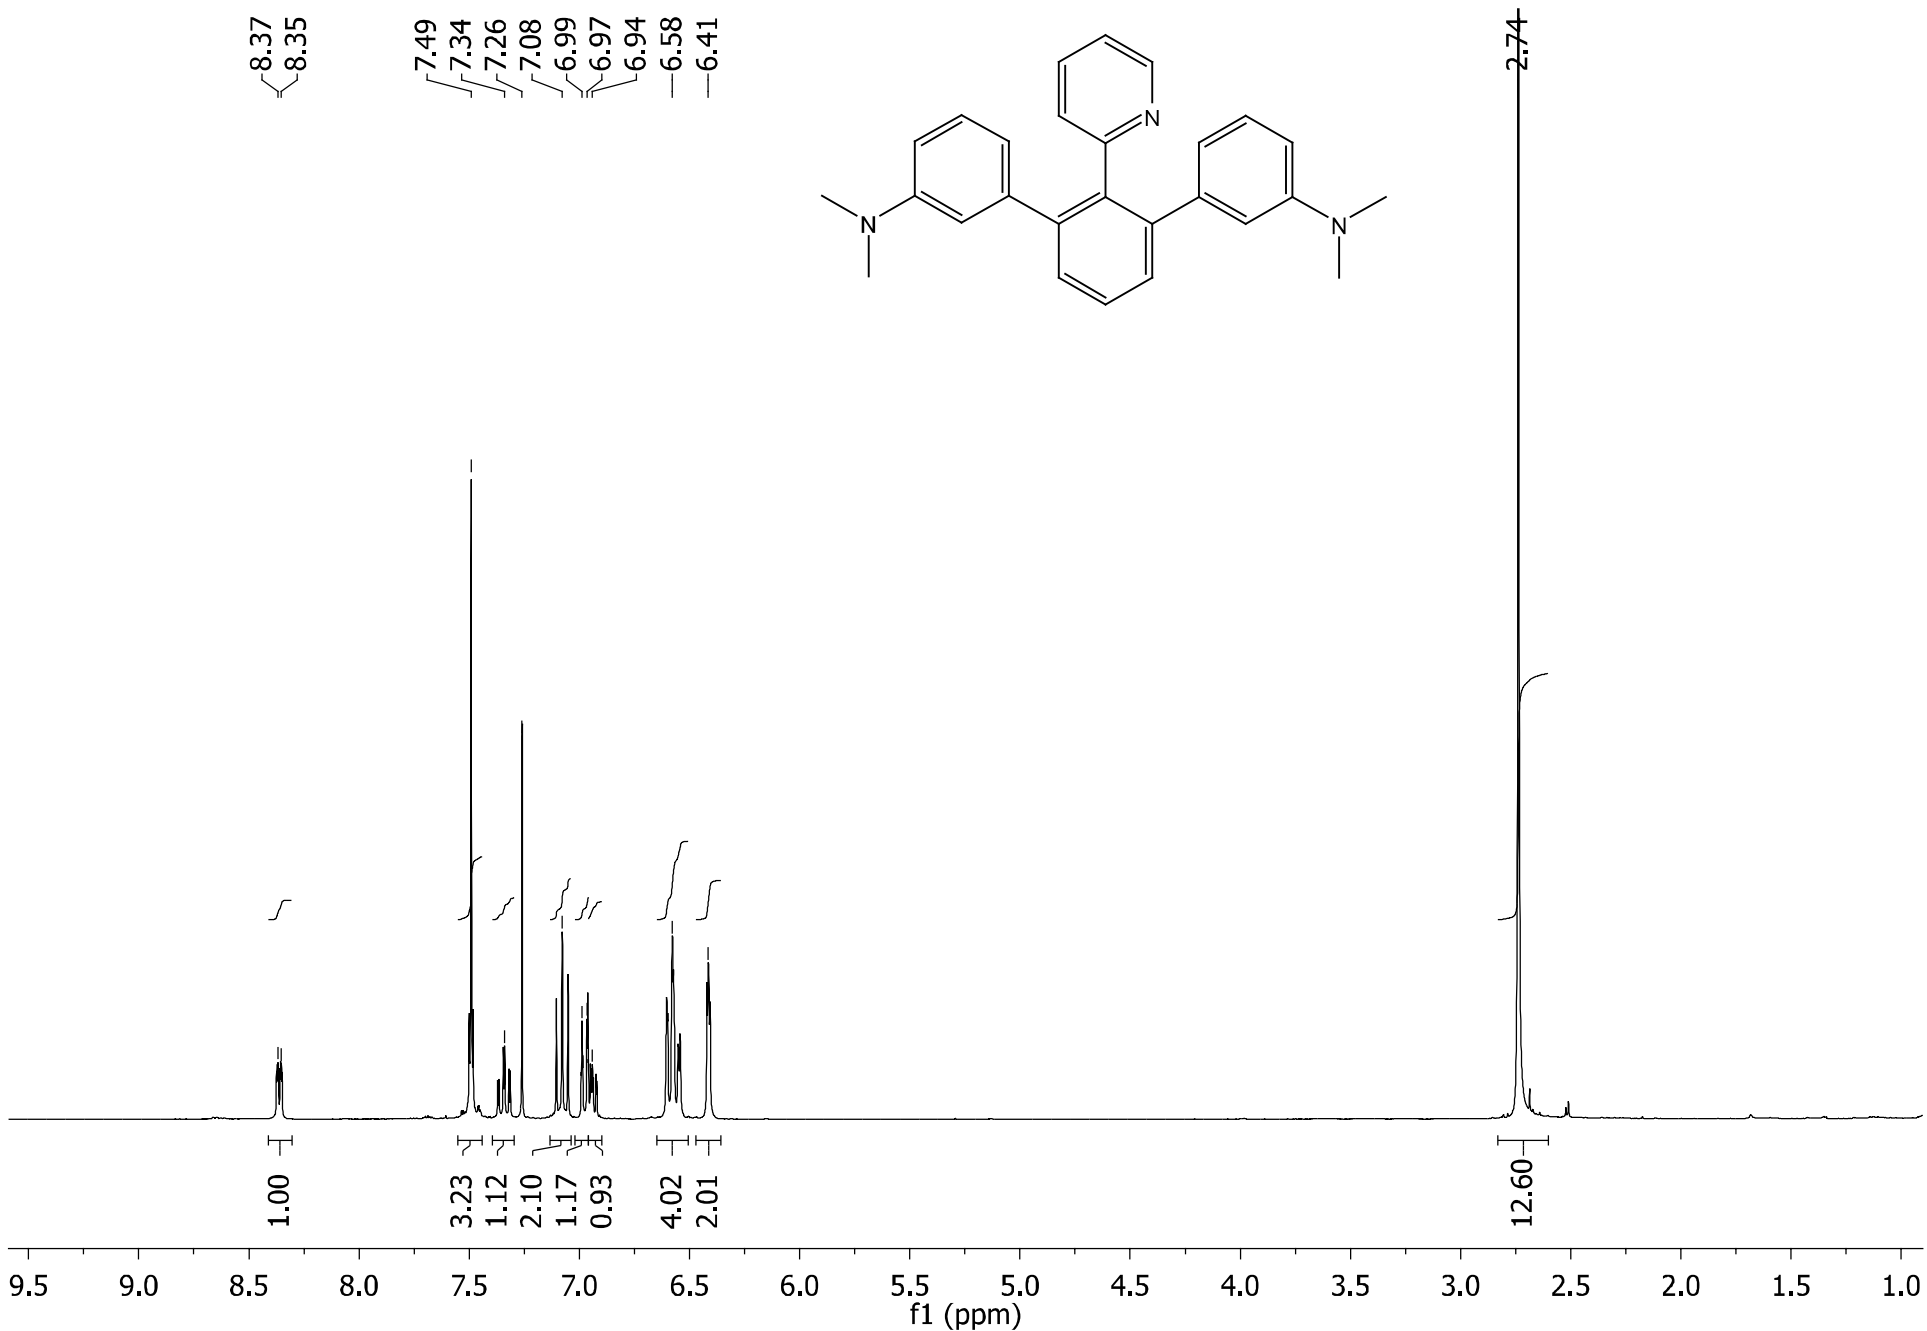

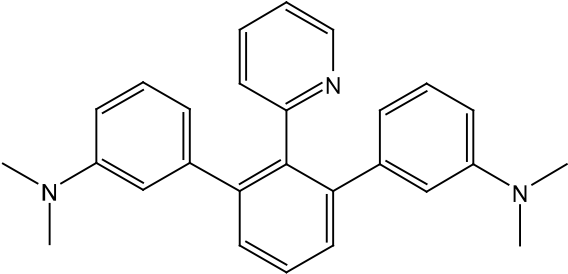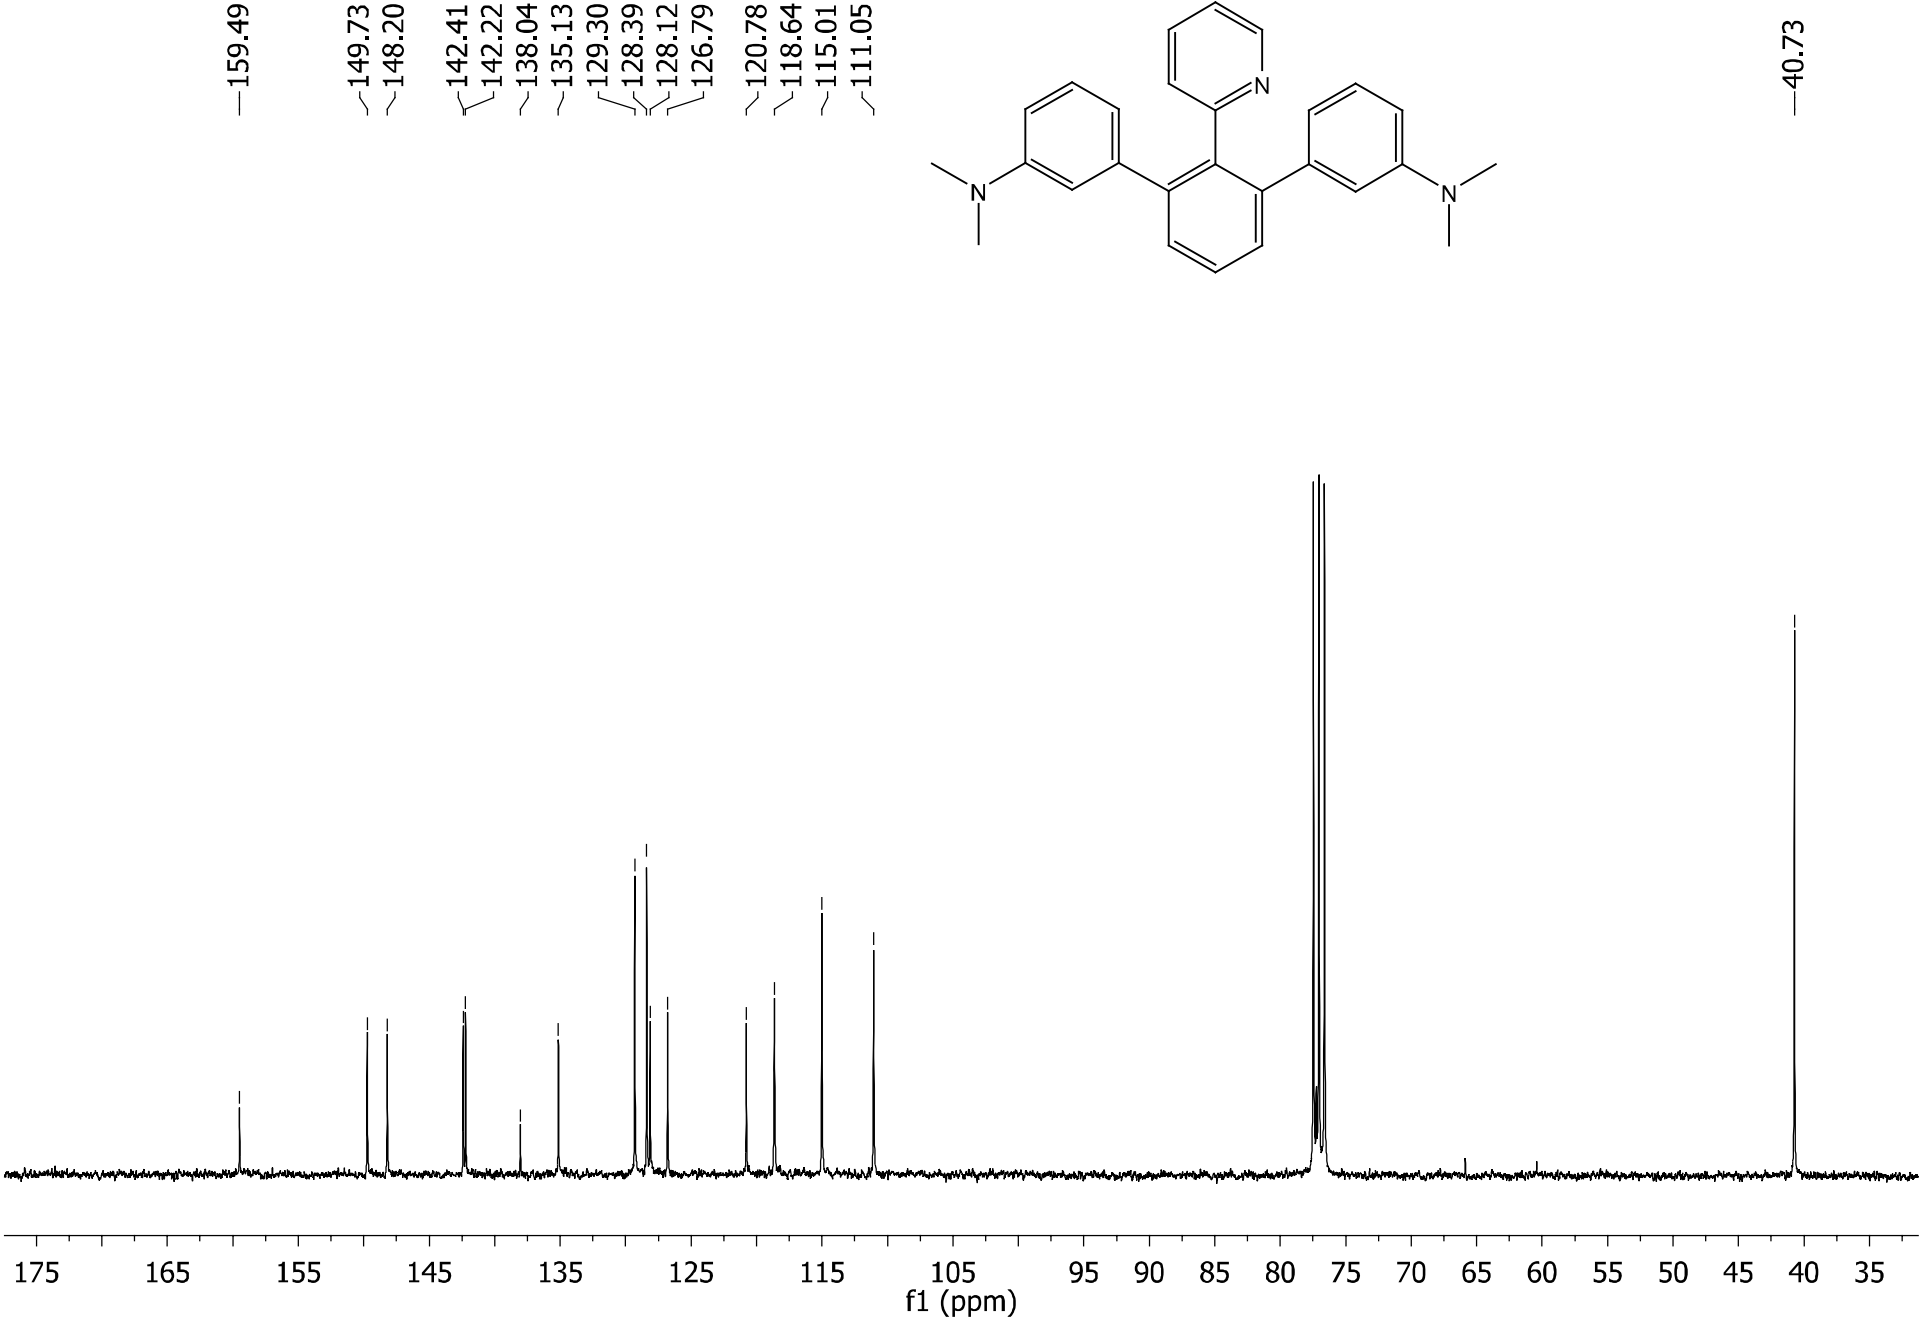

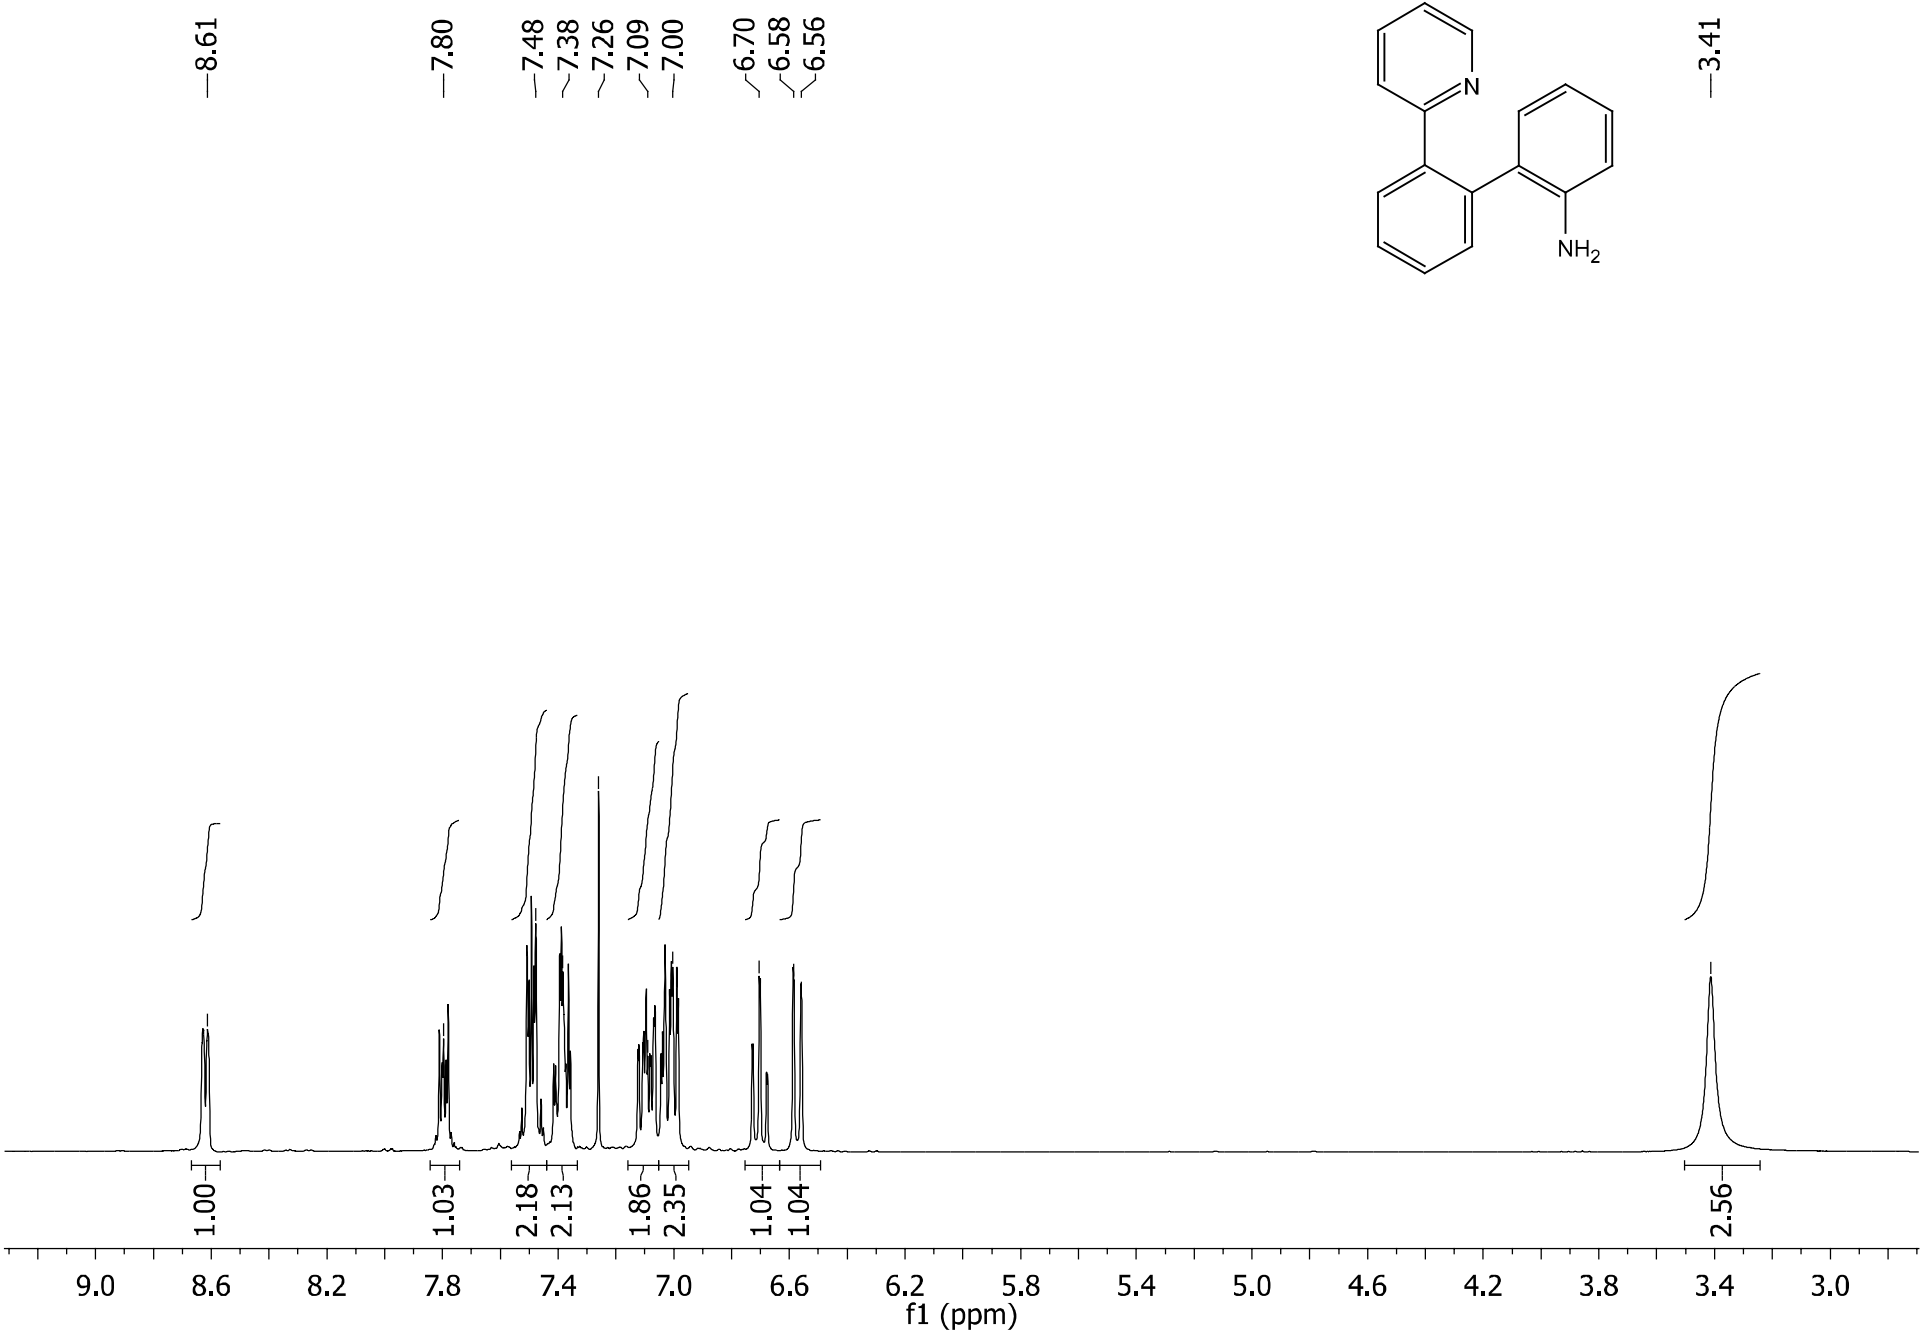

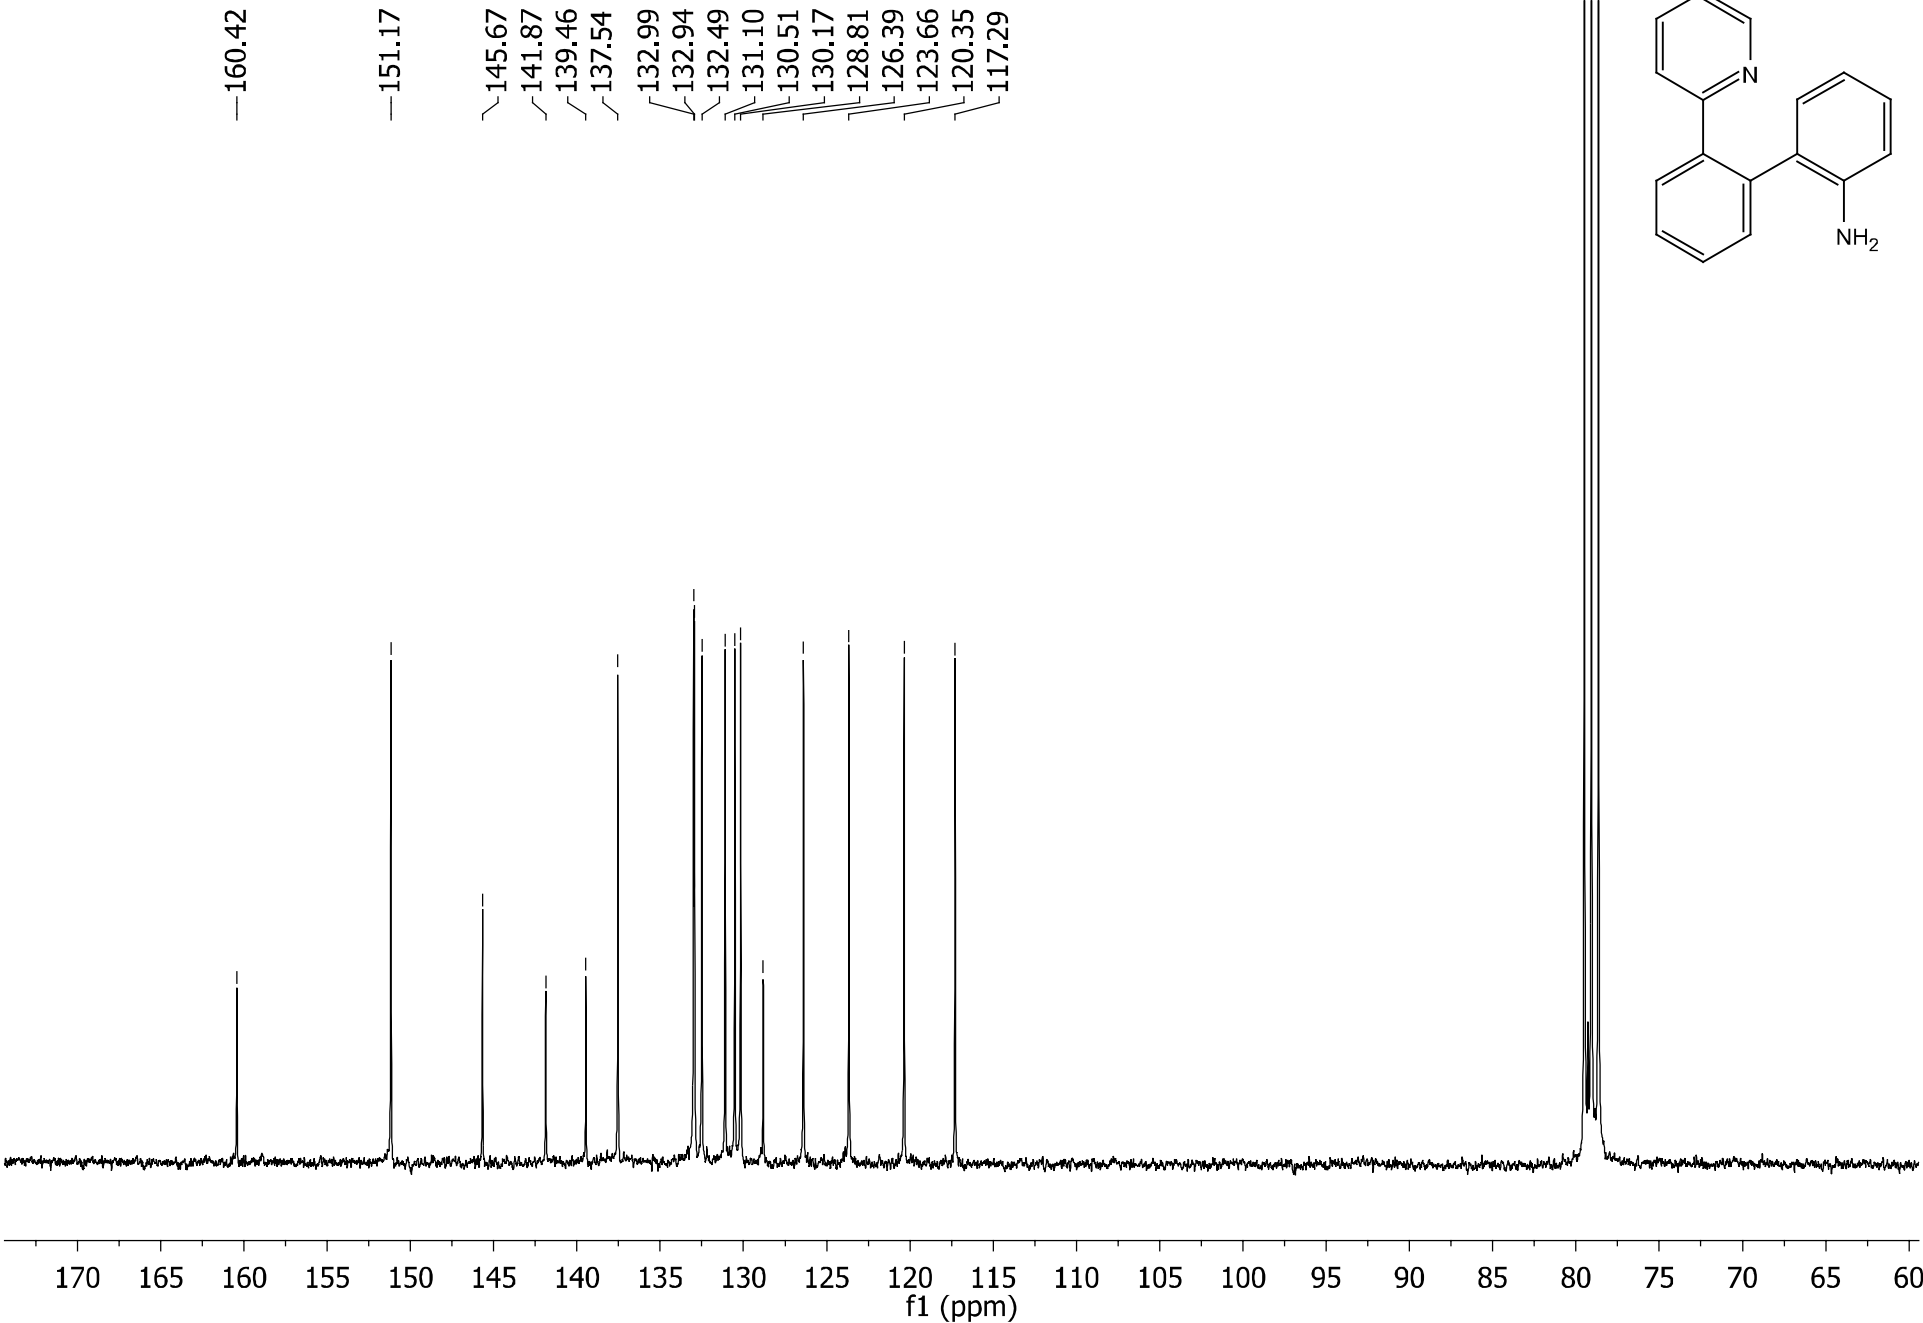

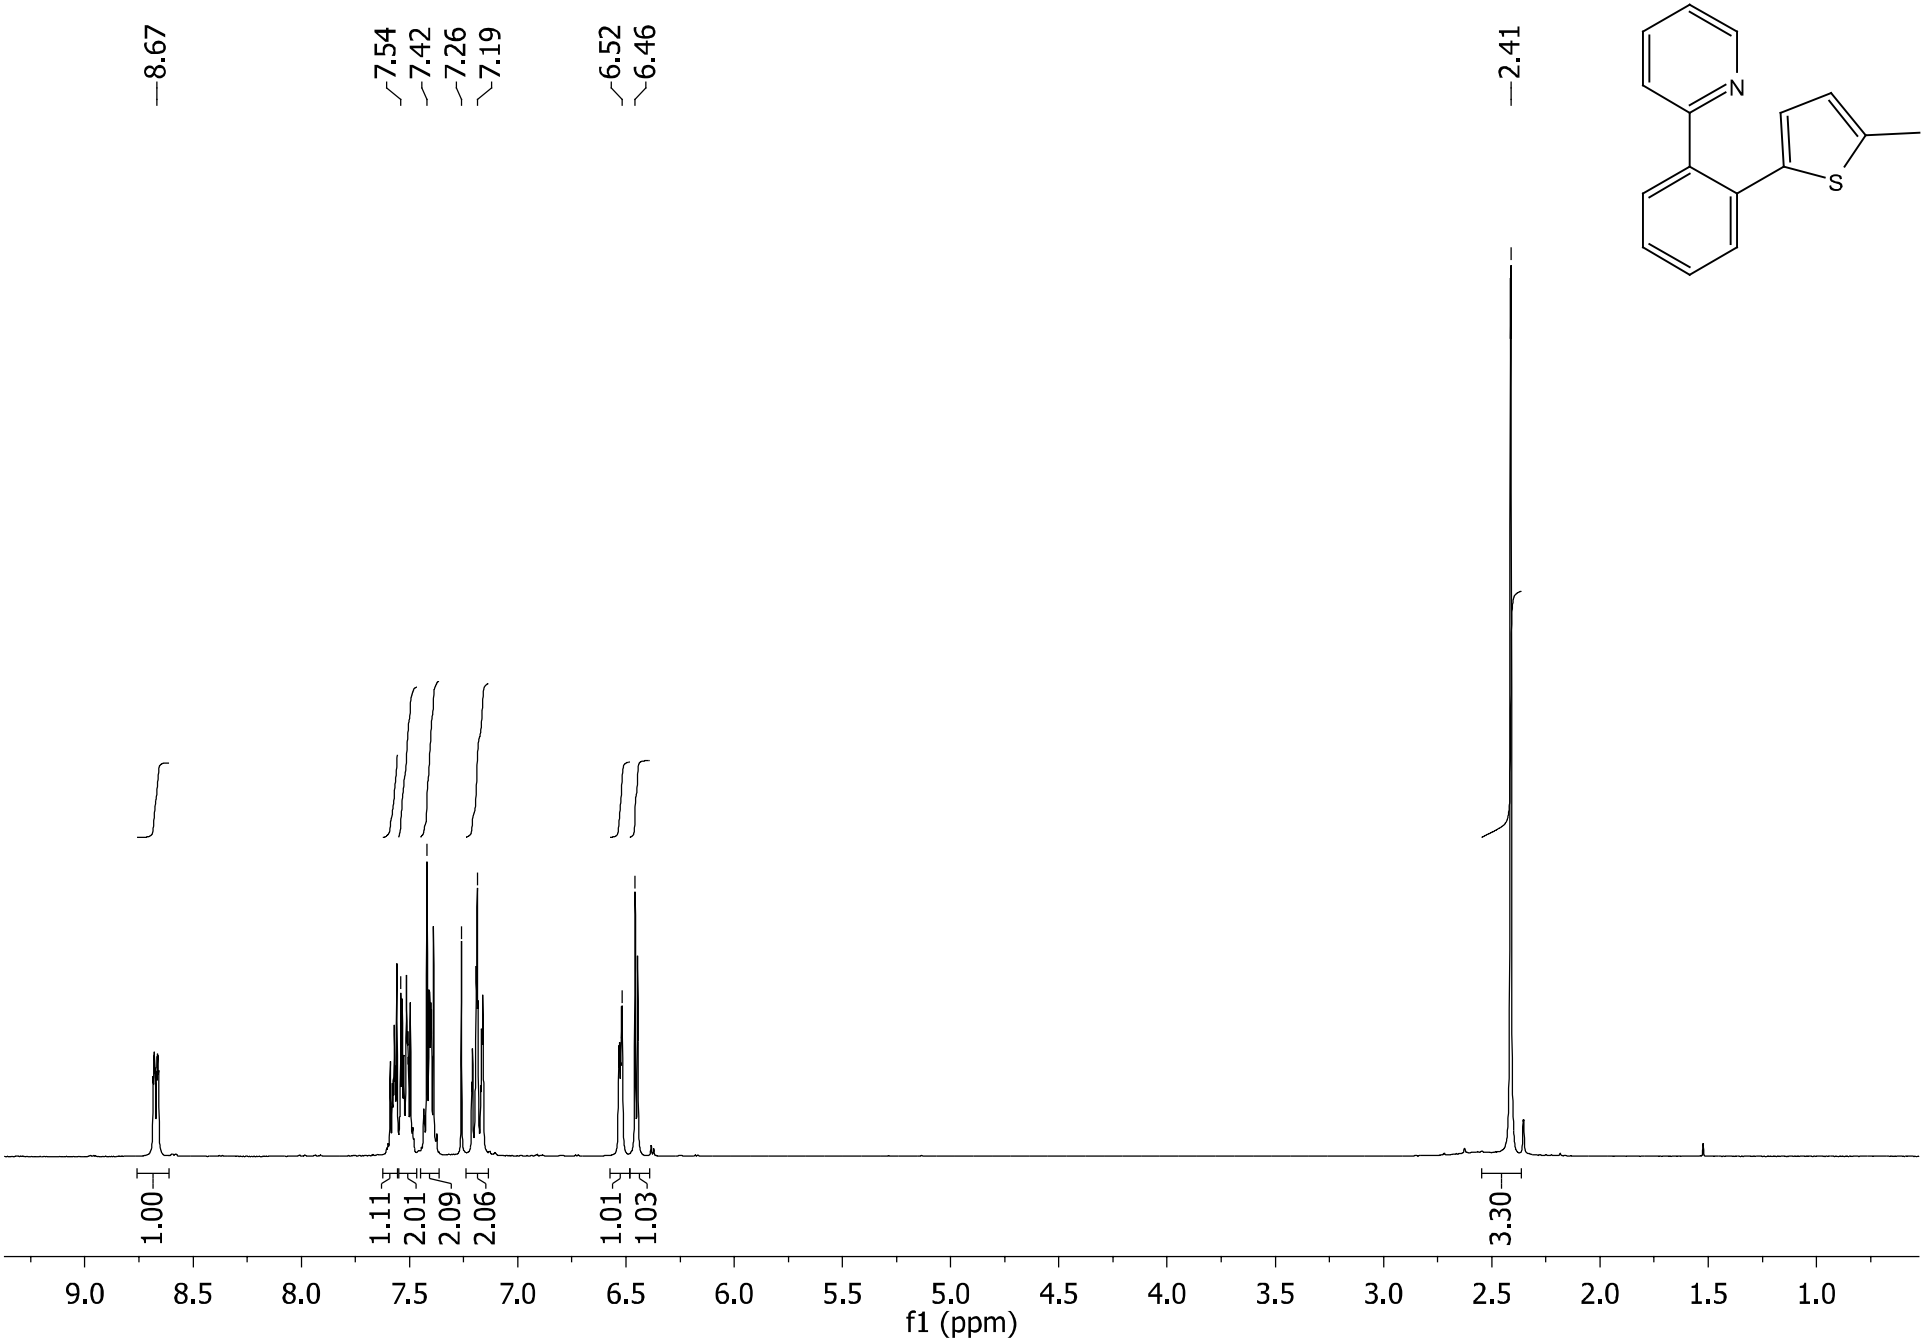

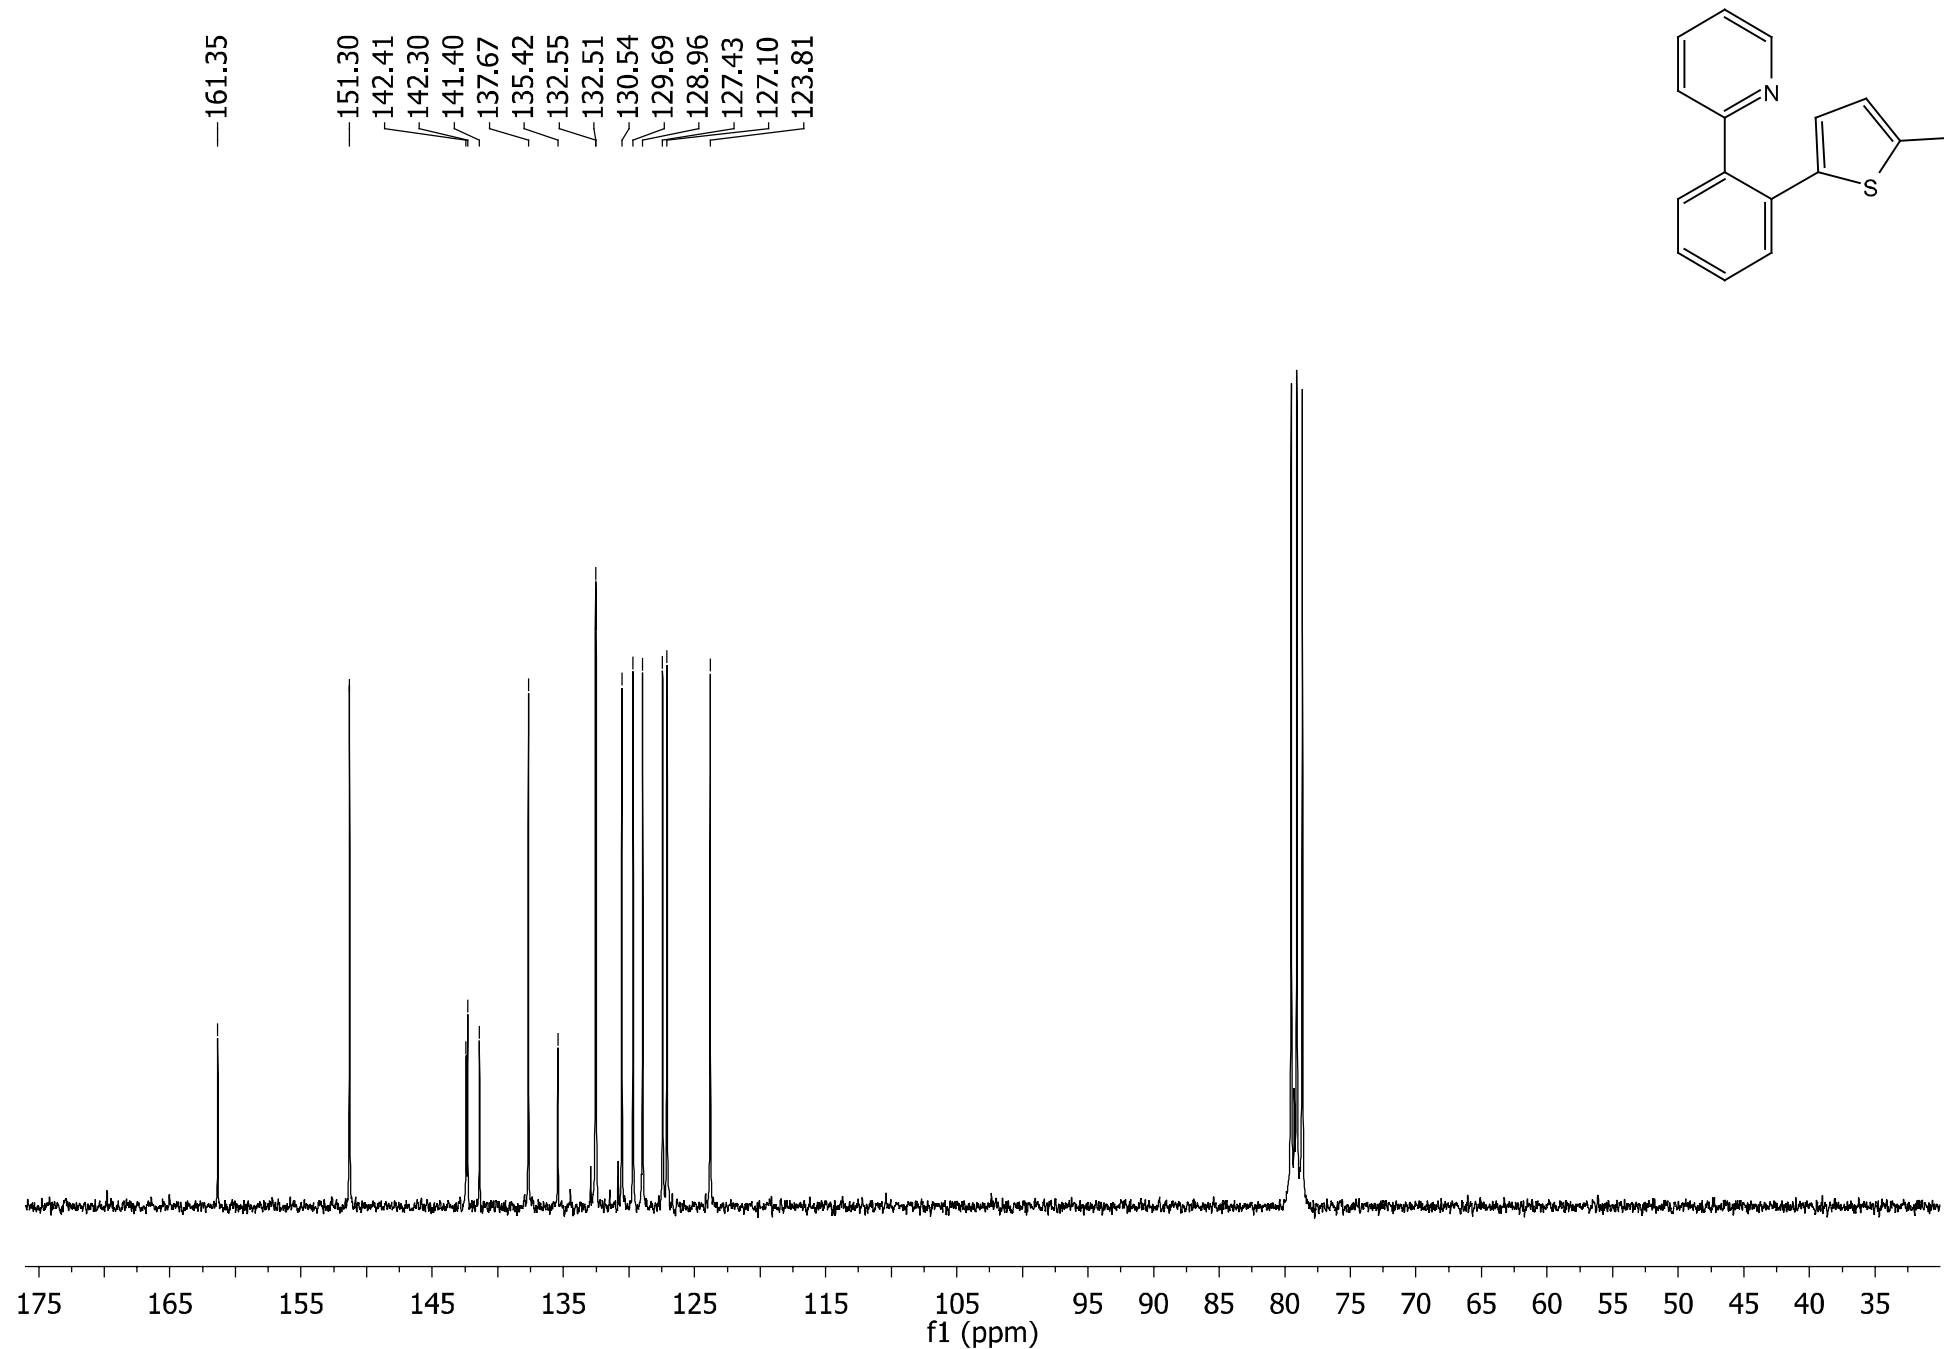



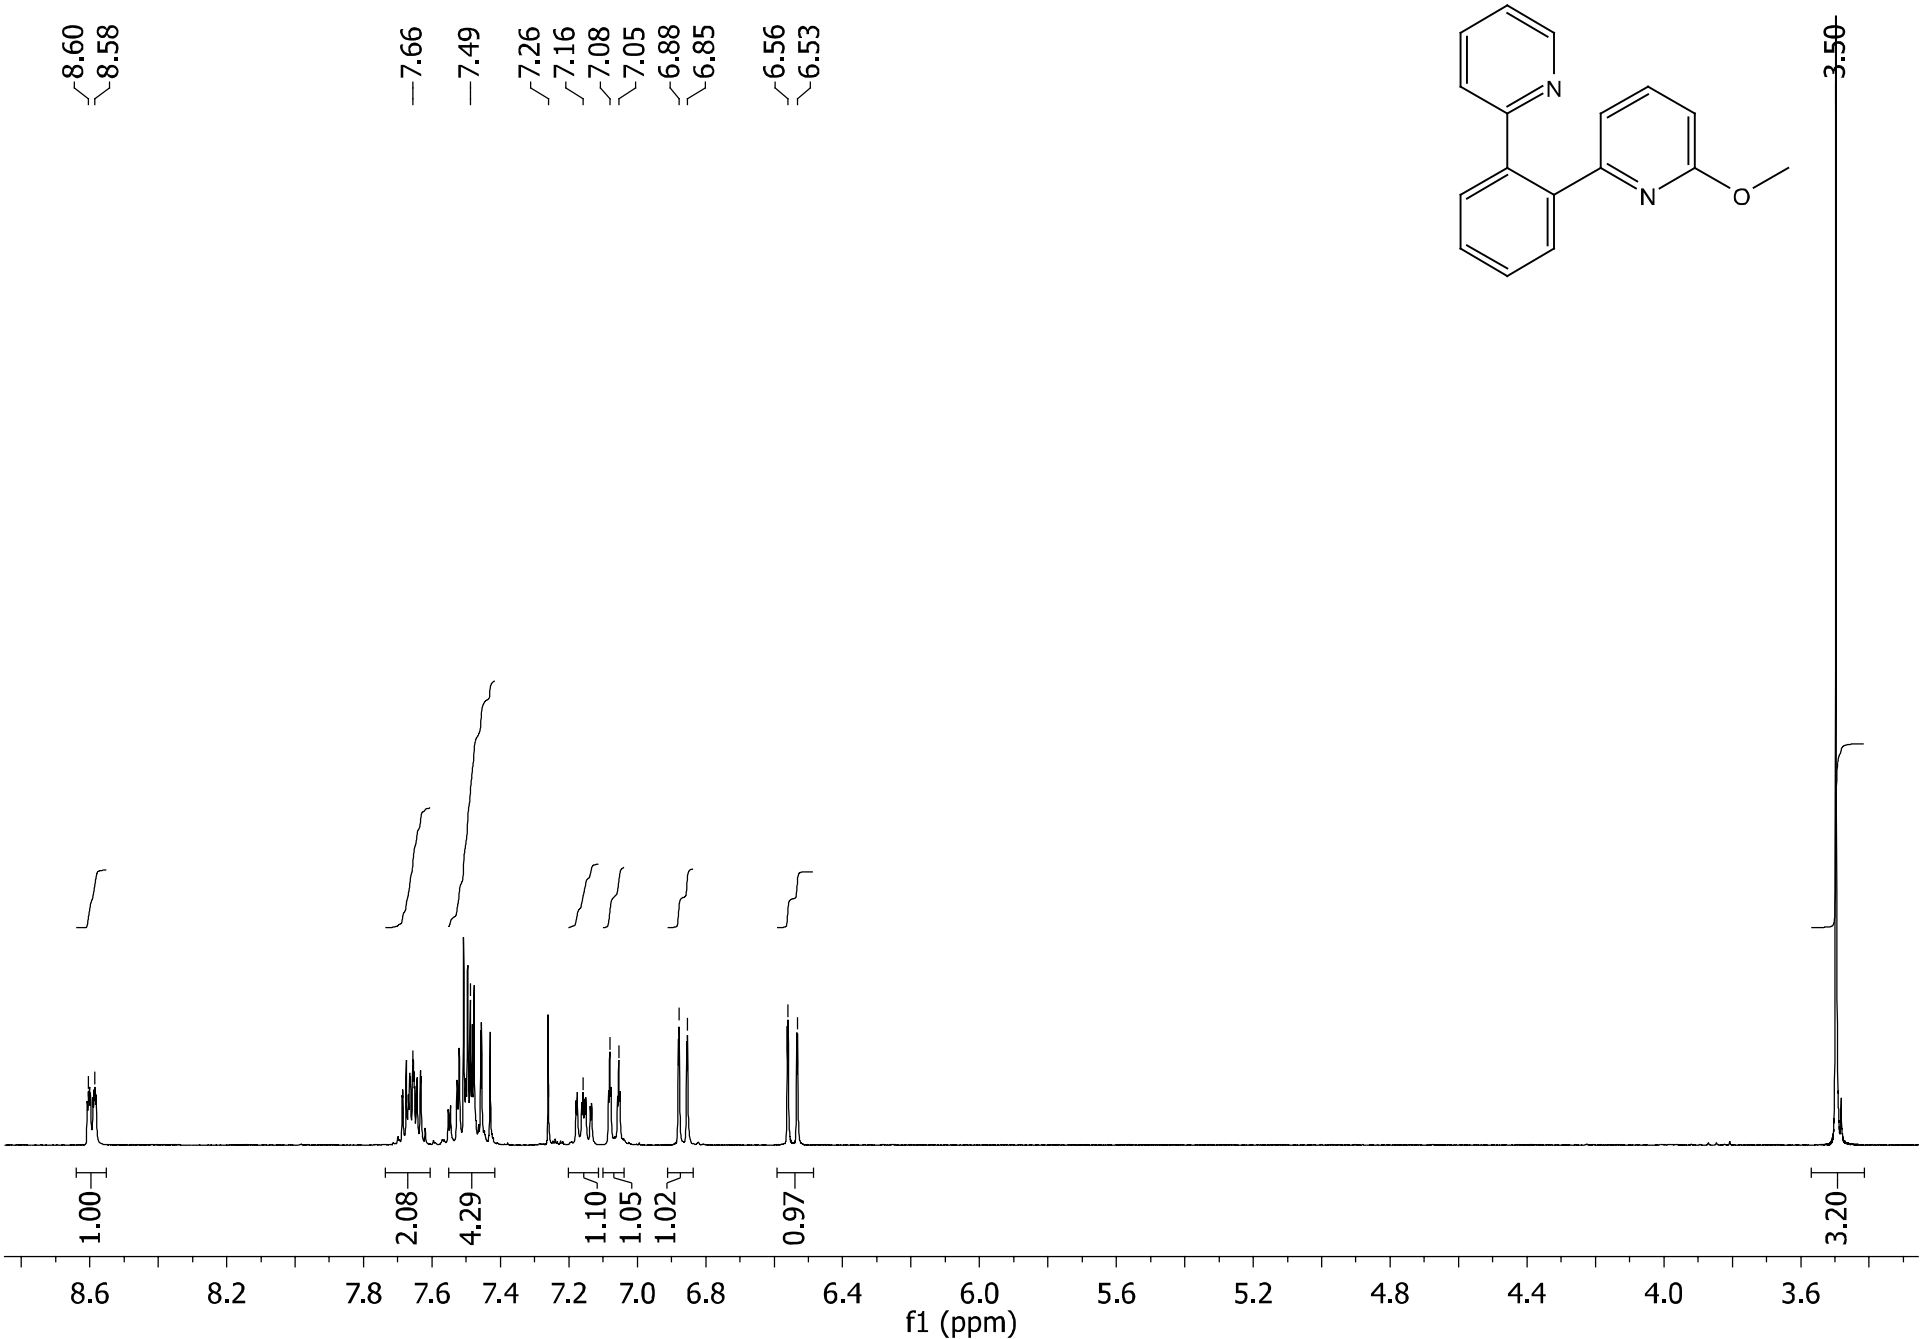

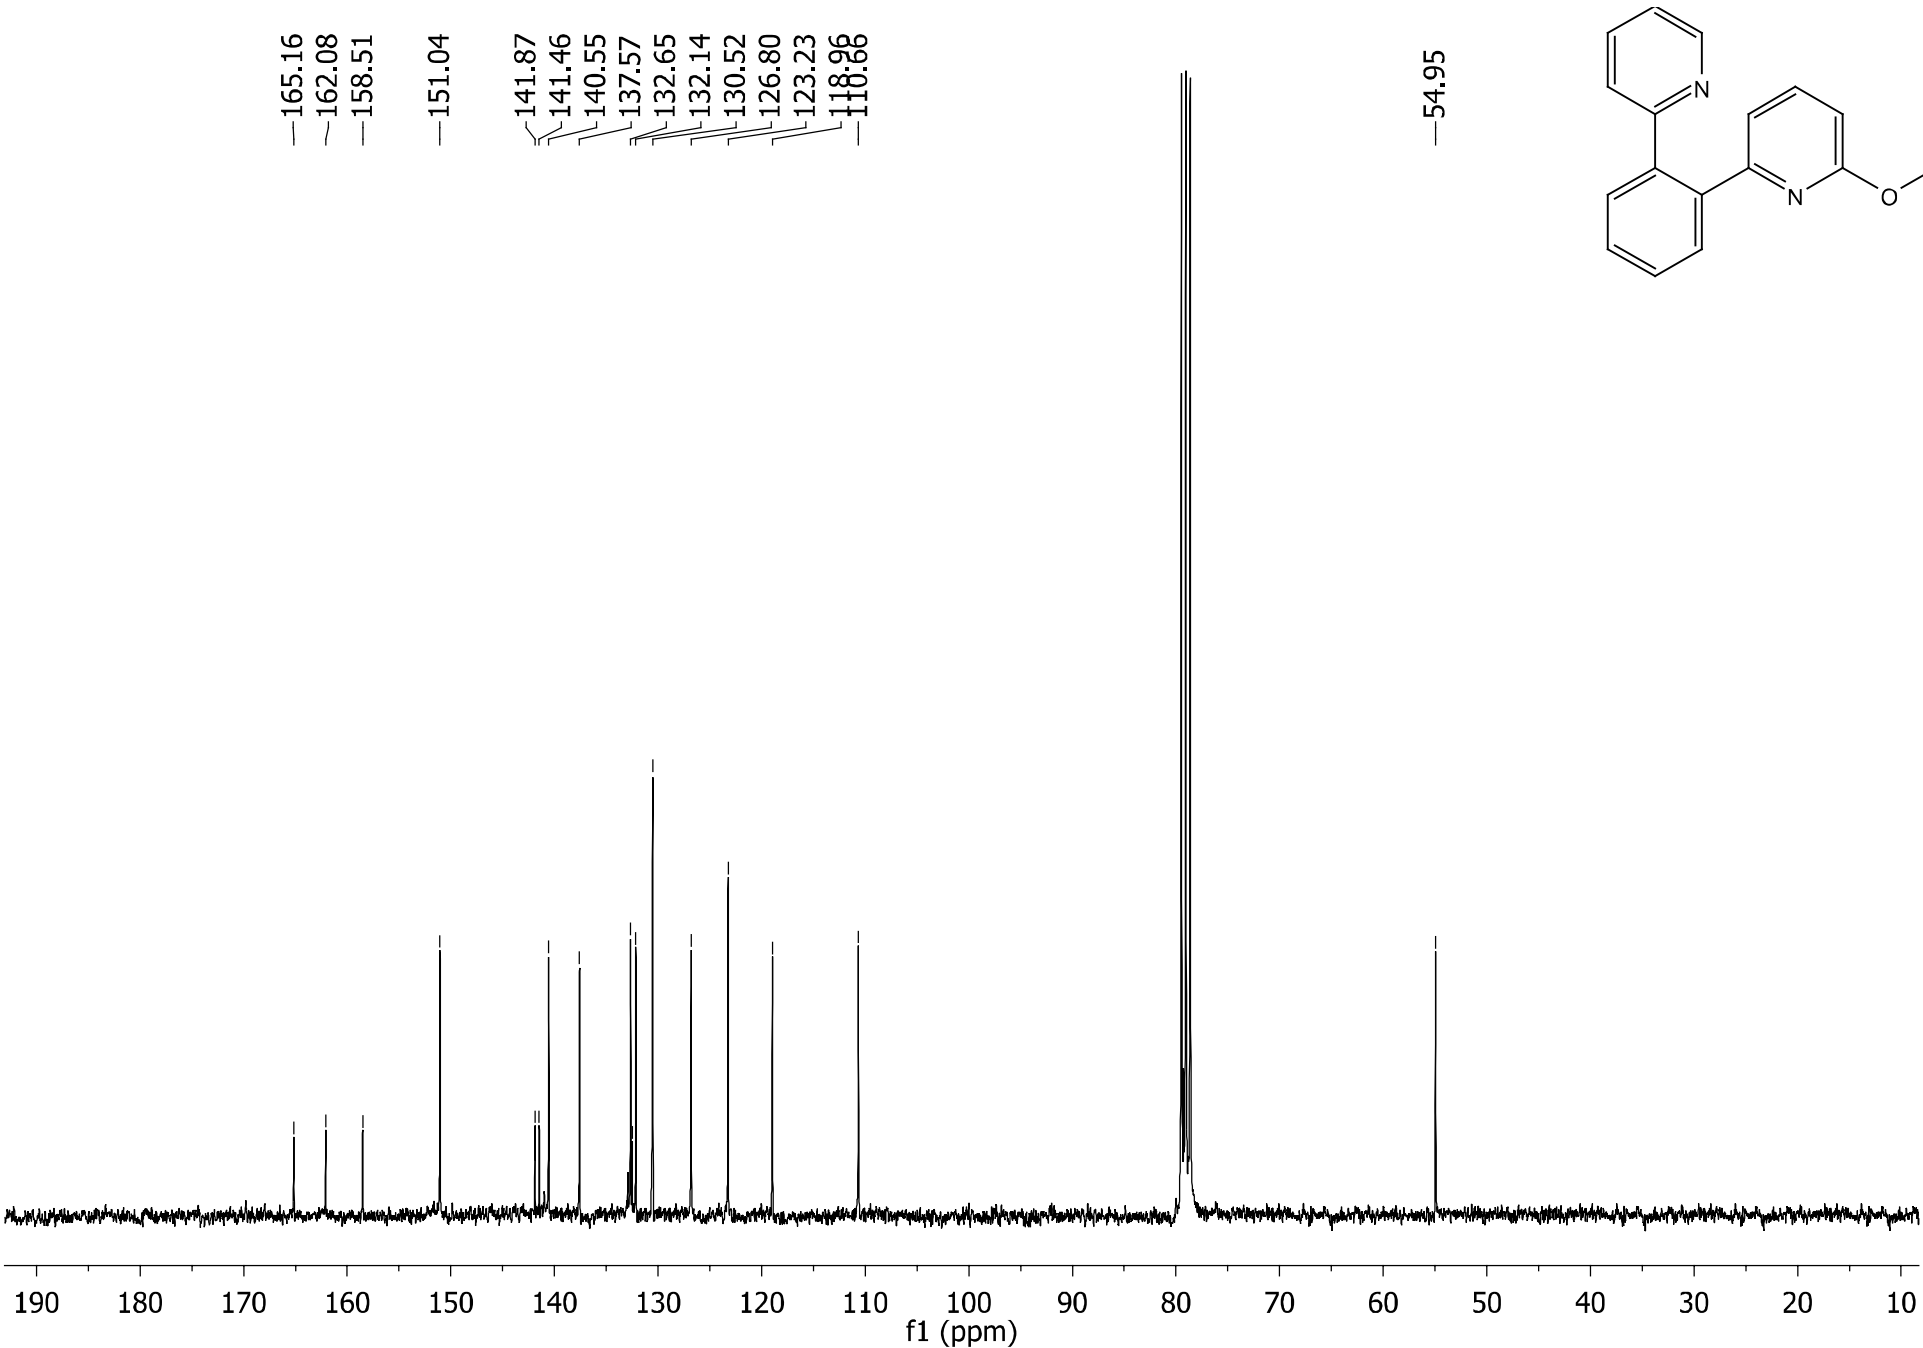

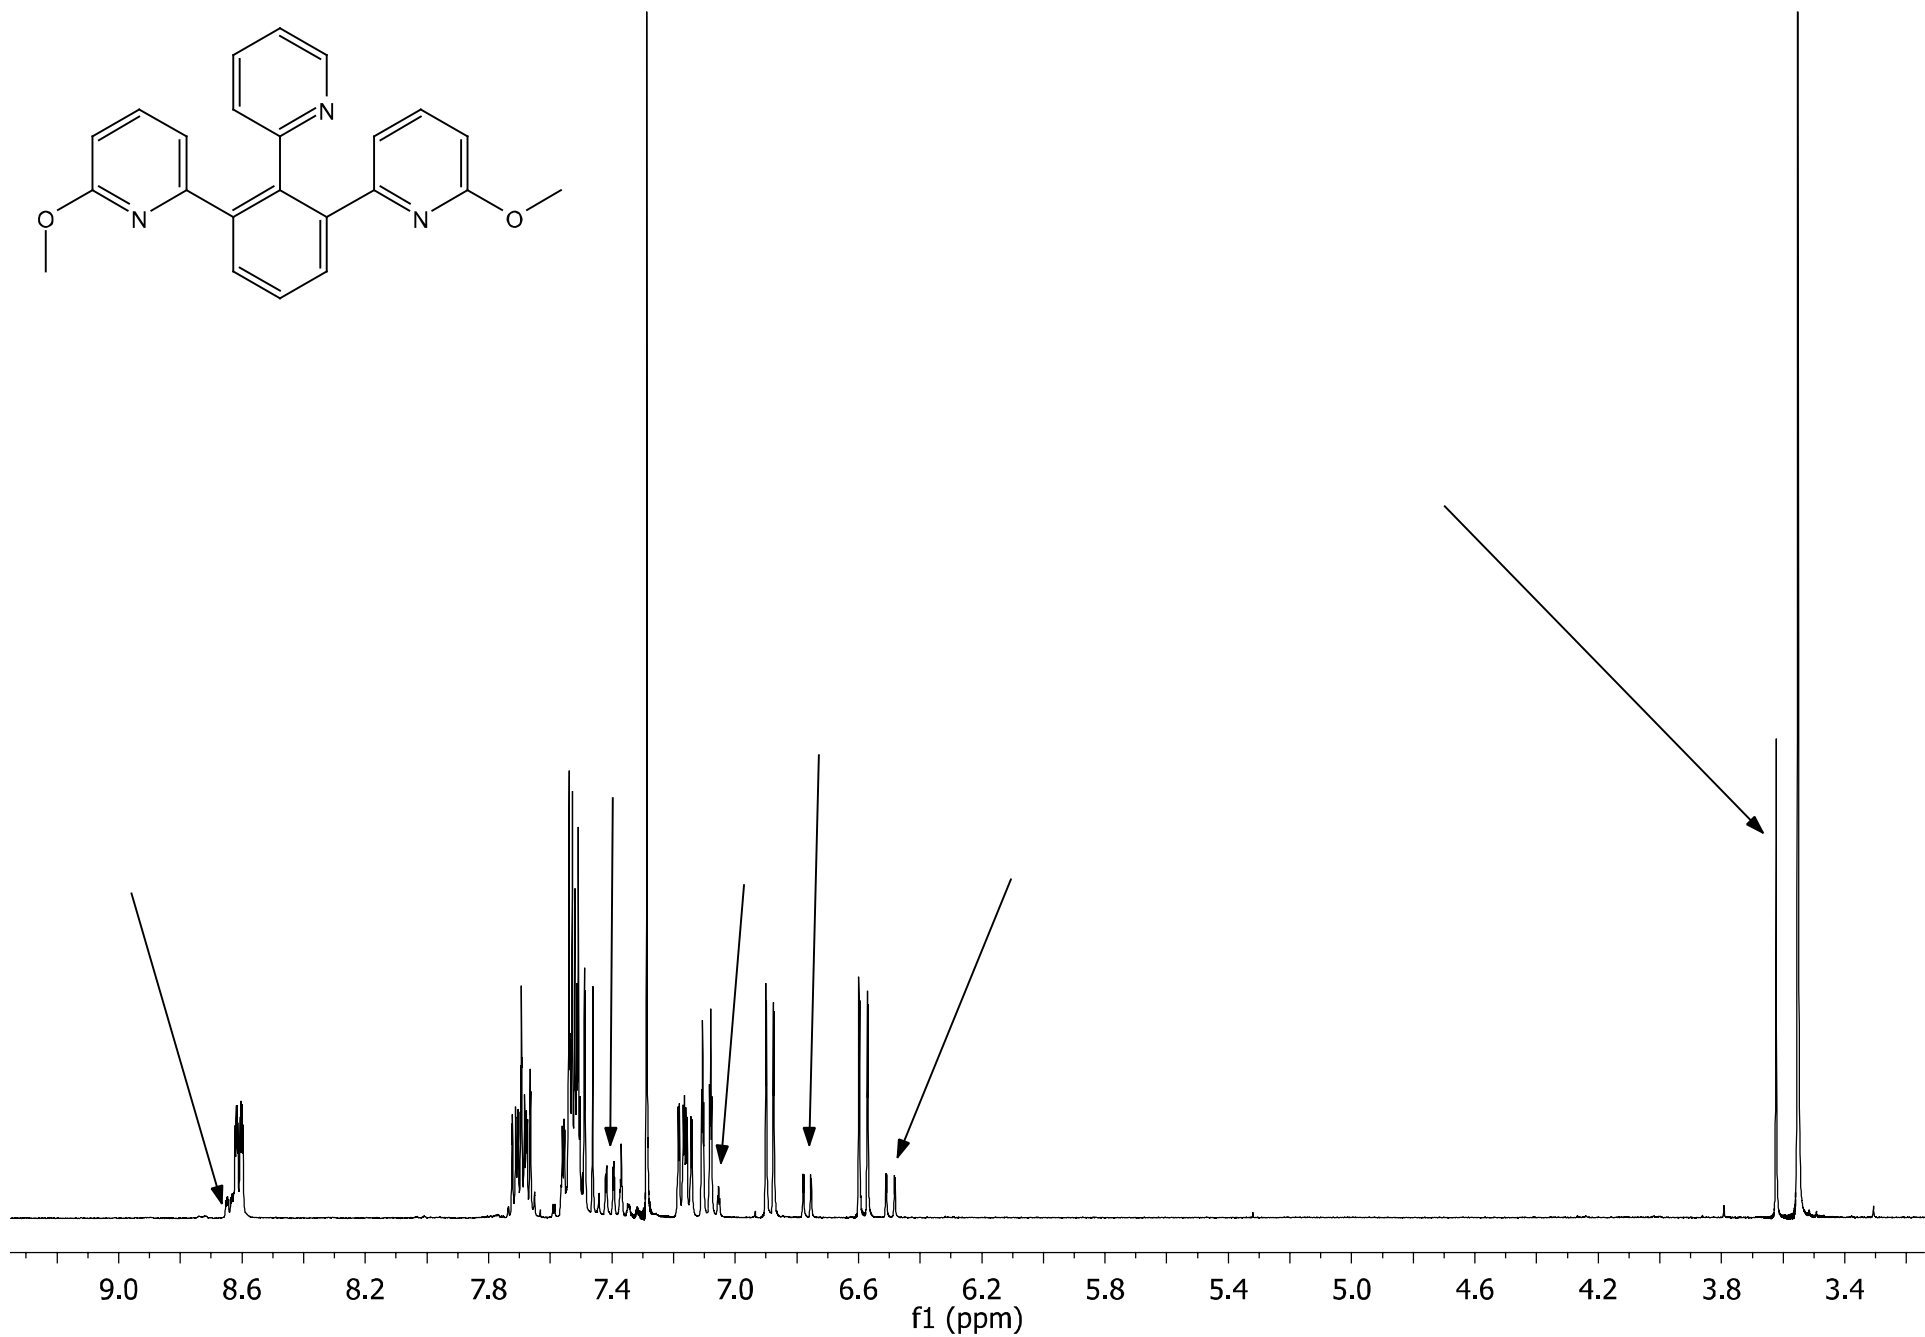

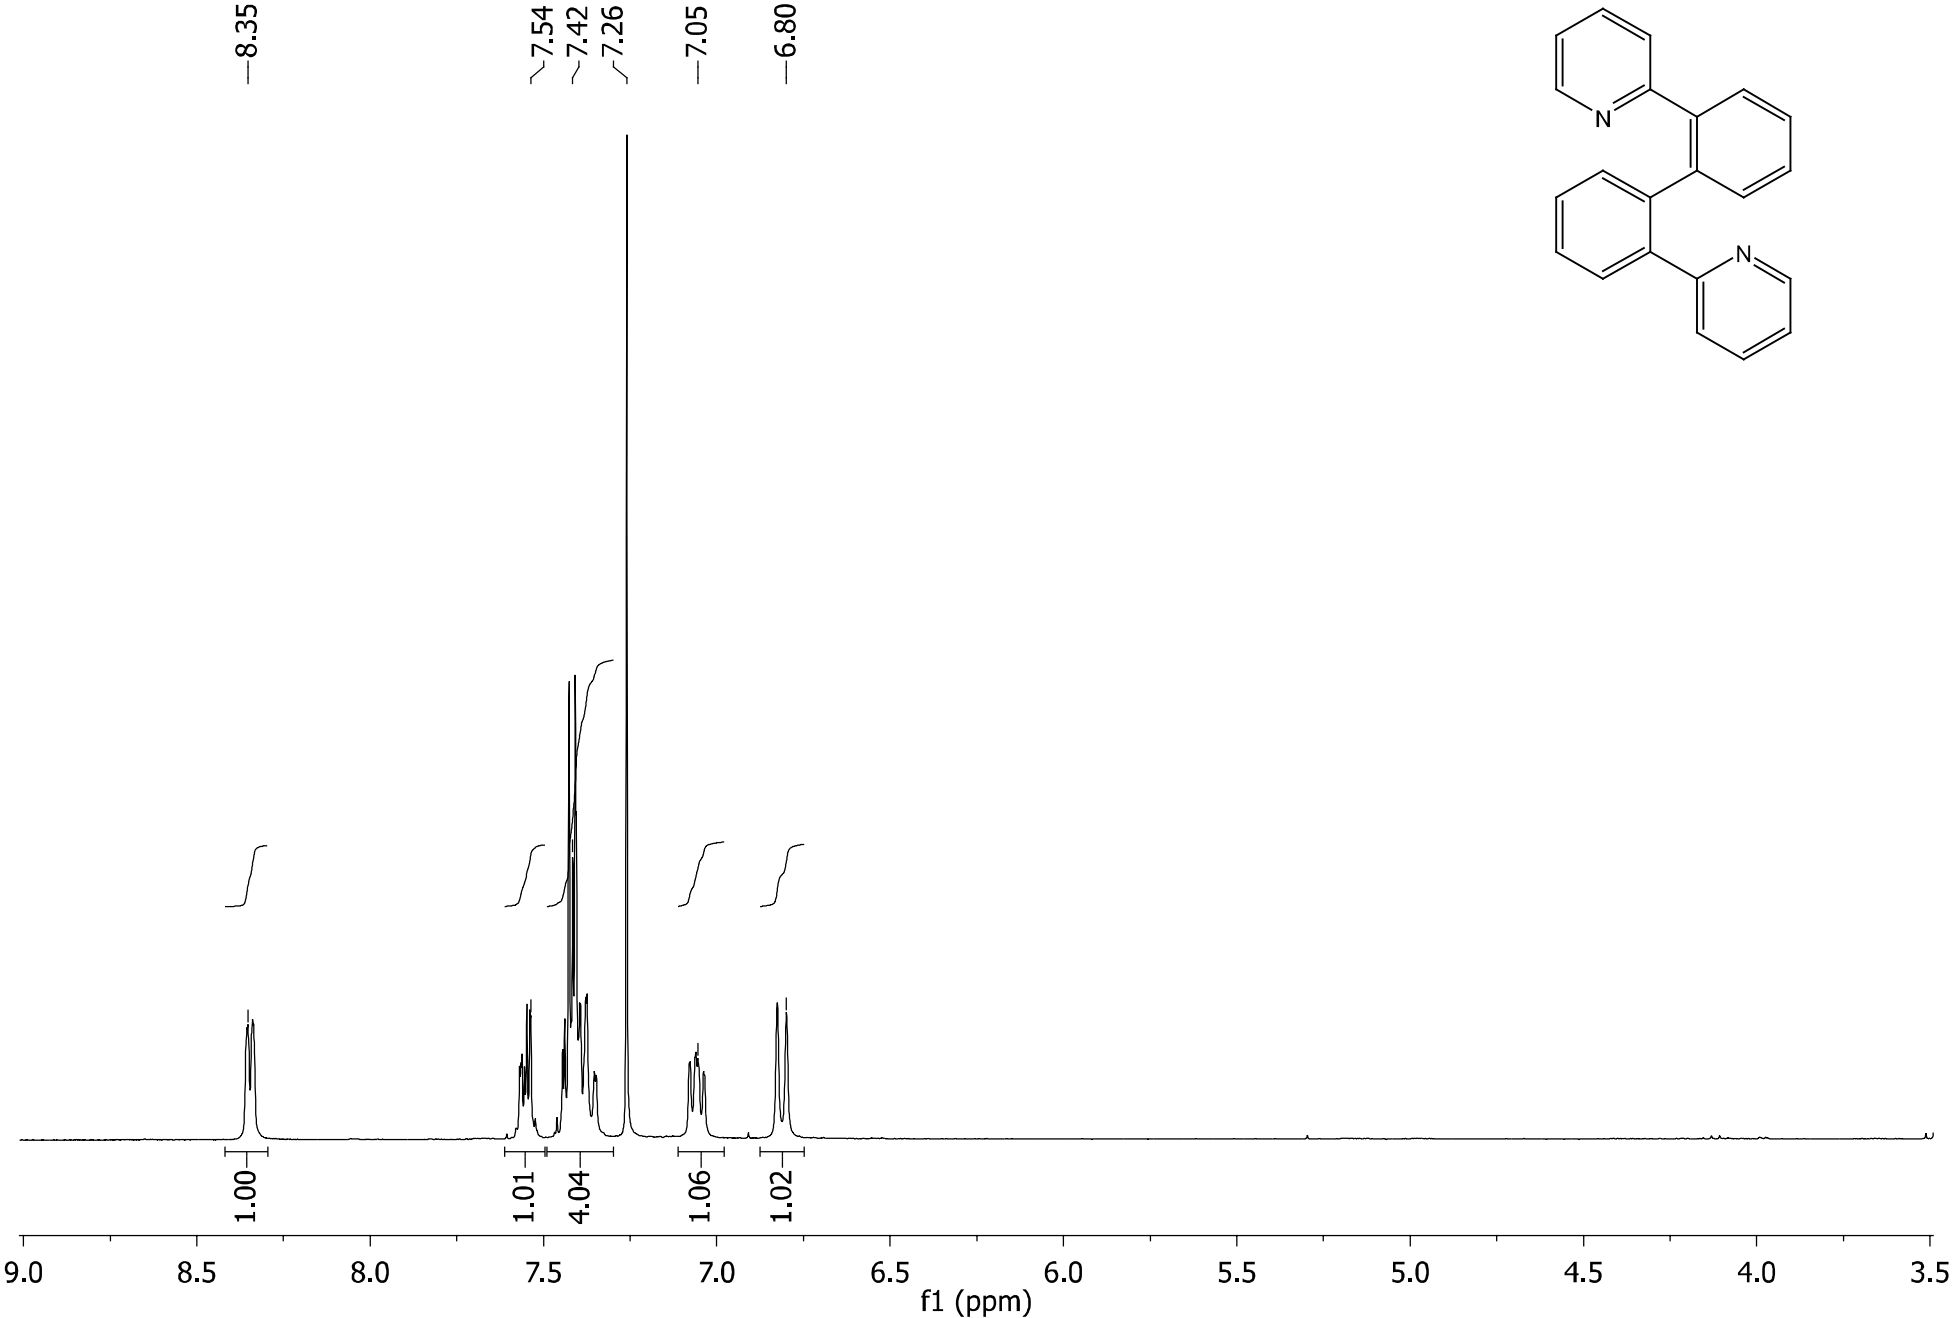

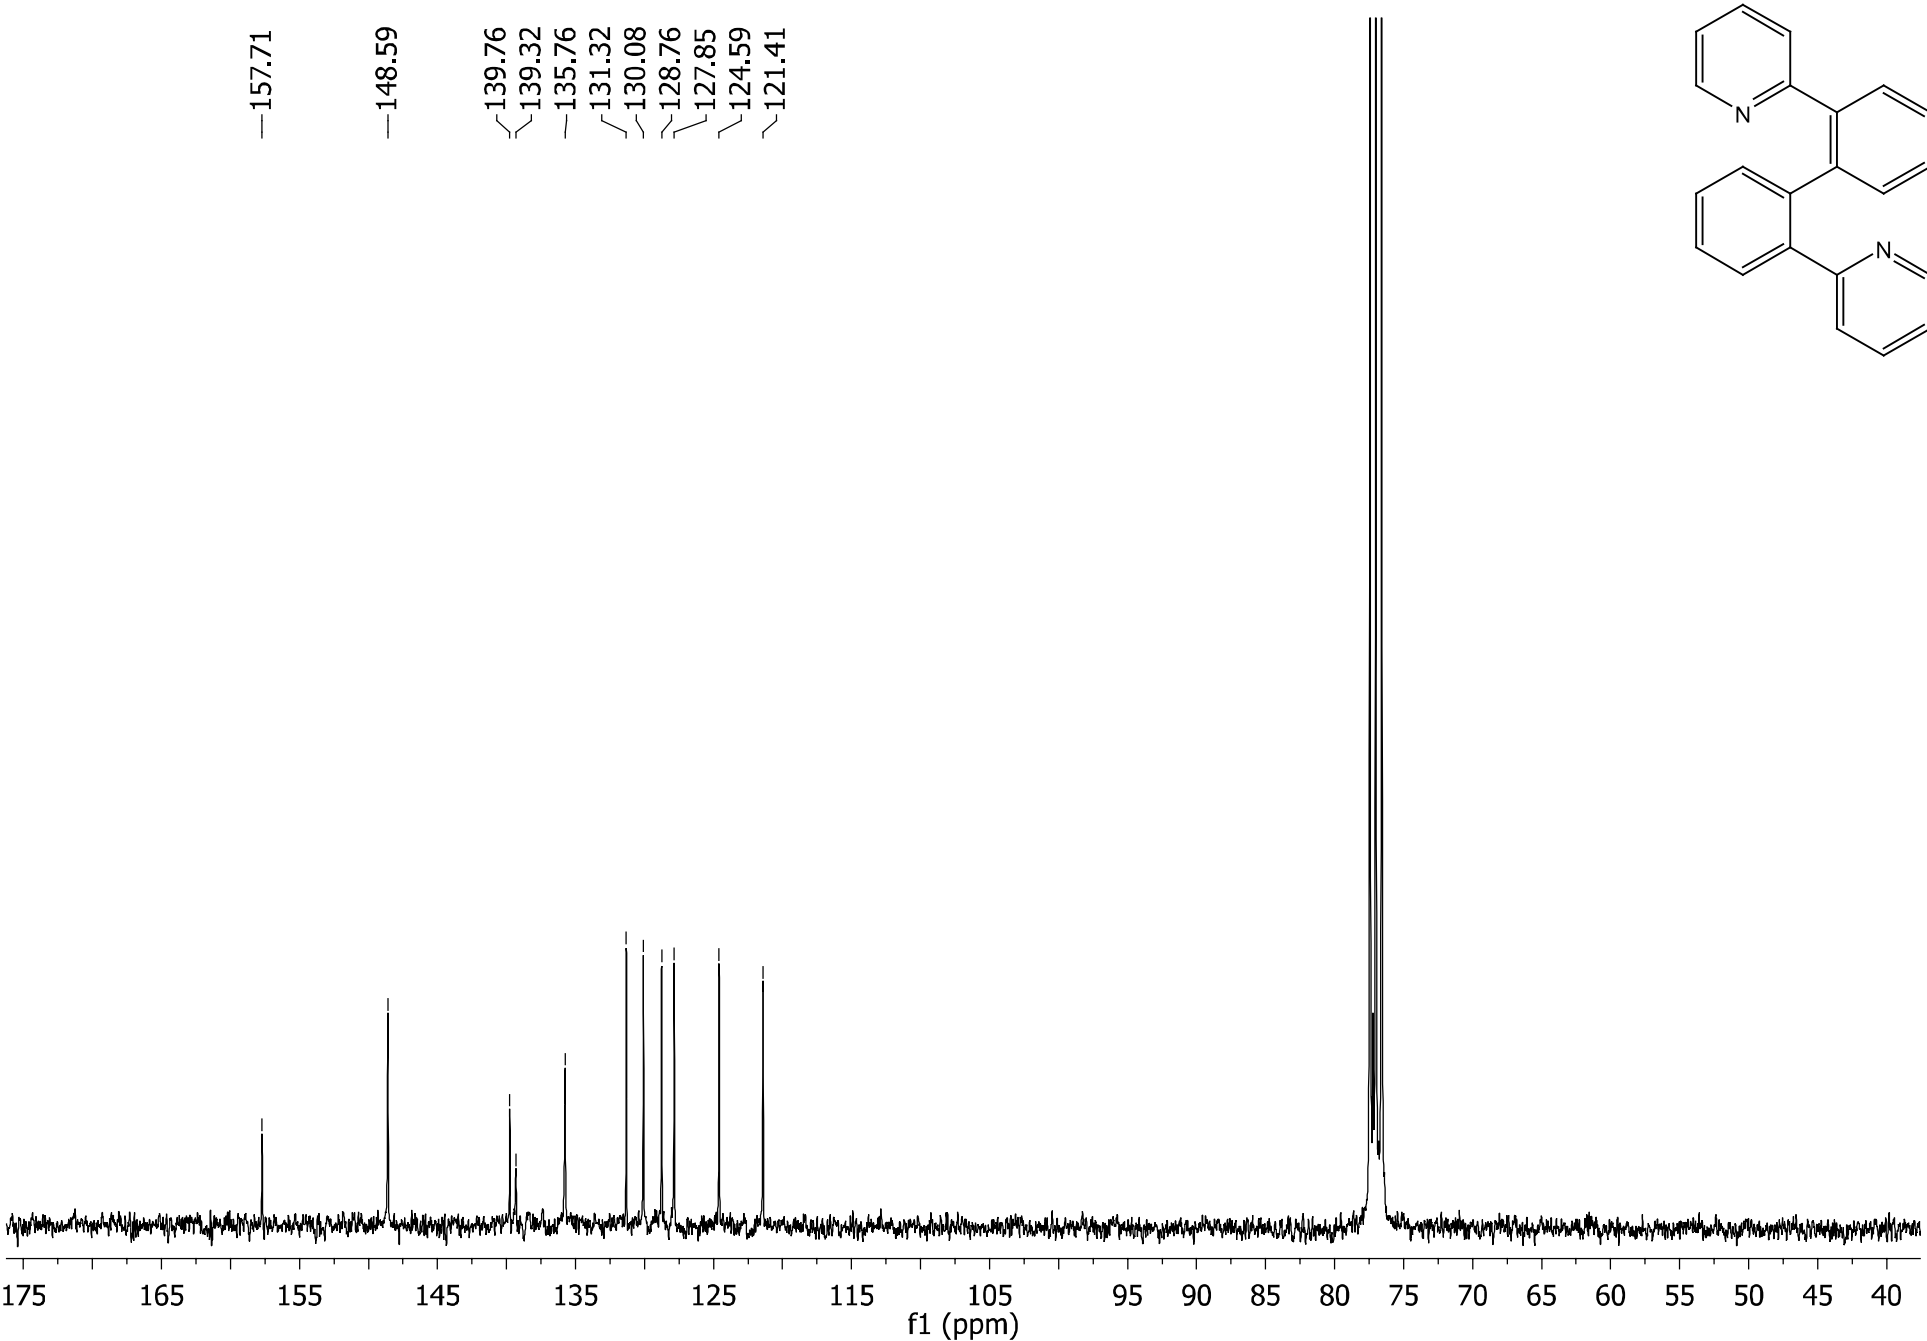

Supplement: c3cc43452d_2.pdf [file c3cc43452d_2.pdf]
